# Supplementary material for: Regioselective oxidative coupling of 2,6-dimethylphenol to tetramethyldiphenoquinone using polyamine dendrimer-encapsulated Cu catalysts
Source: Royal Society of Chemistry journal article supplement (doi:10.1039/c3ra41817k), 2013-01-01
Supplement: c3ra41817k.pdf [file c3ra41817k.pdf]

**Electronic Supplementary Information**

**Regioselective Oxidative Coupling of 2,6-Dimethylphenol to  
Tetradiphenoquinone Using Polyamine Dendrimer-encapsulated Cu Catalysts**

**Zen Maeno,<sup>a</sup> Motohiro Okao,<sup>a</sup> Takato Mitsudome,<sup>a</sup>**

**Tomoo Mizugaki,<sup>a</sup> Koichiro Jitsukawa,<sup>a</sup> and Kiyotomi Kaneda<sup>a,b</sup>**

*<sup>a</sup> Department of Materials Engineering Science, Graduate School of Engineering Science,*

*Osaka University, 1-3, Machikaneyama, Toyonaka, Osaka 560-8531, Japan*

*<sup>b</sup> Research Center for Solar Energy Chemistry, Osaka University*

## General

Third generation ( $G_3$ , where the subscript denotes the generation) poly(propylene imine) (PPI) dendrimer ( $G_3\text{-NH}_2$ ) was purchased from SyMO-Chem B.V. (The Netherlands), and fourth and fifth generation PPI dendrimers ( $G_4$ - and  $G_5\text{-NH}_2$ ) were synthesized from the  $G_3\text{-NH}_2$  by the divergent method.<sup>1S</sup> Surface modification of the  $G_x\text{-NH}_2$  ( $x = 3, 4, \text{ and } 5$ ) with 3,4,5-triethoxybenzoyl chloride groups was carried out using a previously reported procedure.<sup>2S</sup> Polyethyleneimine 10000 ( $M_w = 10,000$ ) was purchased from the Junsei Chemical Co., Ltd. All other chemicals were purchased from Wako Pure Chemicals, the Tokyo Kasei Co. and Sigma-Aldrich Inc. and used after appropriate purification.<sup>3S</sup>  $^1\text{H}$  NMR and  $^{13}\text{C}$  NMR spectra were obtained using a JEOL GSX-270 or JNM-ESC400 spectrometer and chemical shifts ( $\delta$ ) were reported in ppm downfield from tetramethylsilane. Fourier transformed infrared spectra (FTIR) were acquired on a JASCO FTIR-4100 spectrometer and UV-vis spectra were obtained using a JASCO V-660. Cu K-edge X-ray absorption data were collected in the quick mode and recorded at room temperature in the transmission mode at the BL14B2 station attached to the Si(311) monochromator at SPring-8 (JASRI), Harima, Japan (Proposal No. 2012B1869). Data analysis was carried out using the REX2000 program ver. 2.5.7 (Rigaku). Coordination numbers (CN) and interatomic distances ( $R$ ) were estimated by curve-fitting analysis using Cu-Cl and Cu-N shell parameters obtained from reference samples of  $\text{CuCl}_2$ <sup>4S</sup> and  $\text{Cu}(\text{ImH})_4\text{SO}_4$ <sup>5S</sup>.

## Preparation of PPI dendrimer-encapsulated Cu complexes

The procedure for the preparation of the  $G_4\text{-Cu}^{2+}_{12}$  PPI dendrimer-encapsulated Cu complex, which is typical of all the syntheses, was as follows.  $\text{CuCl}_2$  (5  $\mu\text{mol}$ ) and  $G_4\text{-TEBA}$  (Figure S1, 0.42  $\mu\text{mol}$ ) were added to 1.5 mL of  $\text{CH}_3\text{CN}/\text{CHCl}_3$  (1:2 v/v) and the

mixture was stirred for 2 h under an Ar atmosphere at 25 °C. The resulting solution was evaporated to afford  $G_4\text{-Cu}^{2+}_{12}$  as a brown, waxy solid.

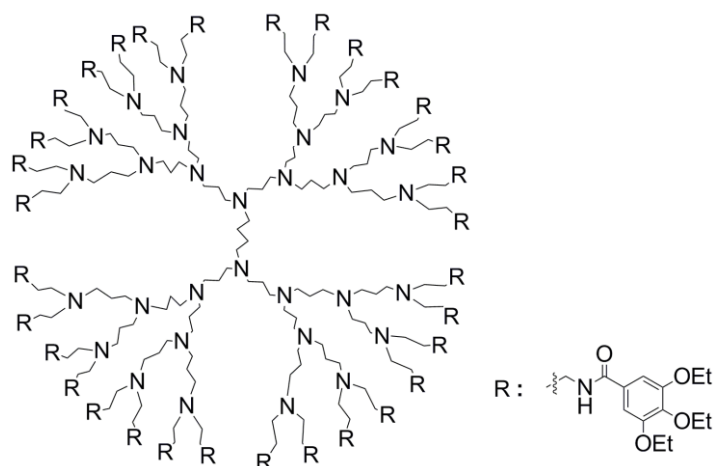

**Fig. S1** Structure of the  $G_4$ -PPI dendrimer modified with triethoxybenzamide groups ( $G_4$ -TEBA).

### Oxidative coupling of 2,6-dimethylphenol (**1a**) to 3,3',5,5'-tetramethyldiphenoquinone (**2a**) using $G_4\text{-Cu}^{2+}_{12}$

**1a** (0.5 mmol) was added to 4 mL of a  $\text{CHCl}_3$  solution of  $G_4\text{-Cu}^{2+}_{12}$  (5  $\mu\text{mol}$  Cu) and the mixture was stirred under  $\text{O}_2$  (1 atm) at 50 °C. Following completion of the reaction, hexadecane was added as an internal standard and the mixture was treated with aqueous 6 N HCl, after which the organic phase was separated and characterized by  $^1\text{H}$  NMR.

### Substrate scope of $G_4\text{-Cu}^{2+}_{12}$

The high selectivity for C–C coupling by  $G_4\text{-Cu}^{2+}_{12}$  was exemplified in the reaction of other 2,6-disubstituted phenols.  $G_4\text{-Cu}^{2+}_{12}$  efficiently catalyzed the C–C selective coupling reaction of a 2,6-substituted phenol incorporating isopropyl groups (**1b**) to afford a 97% yield of 3,3',5,5'-tetraisopropyldiphenoquinone (**2b**). In addition, 6-*t*-butyl-*o*-cresol (**1c**) was also selectively converted to 3,3'-di-*t*-butyl-5,5'-dimethyldiphenoquinone (**2c**) in 95% yield.

$G_4\text{-Cu}^{2+}_{12}$  was not, however, an effective catalyst for the coupling reaction of unsubstituted phenol or for phenol derivatives with electron-withdrawing chlorine atom substituents. Other Cu catalyst systems investigated to date were also unable to promote the oxidative coupling reactions of phenol and 2,6-dichlorophenol.<sup>6S, 7S</sup>

### Product purification following the gram scale synthesis of **2a**

Following the coupling reaction, the supernatant of the reaction mixture was passed through a silica gel column (Wakogel C-200). Byproducts were first removed by elution with hexane/ethyl acetate (3:2) and **2a** was subsequently eluted with hexane/ $\text{CH}_2\text{Cl}_2$  (1:3). Evaporation of the solvent gave **2a** in 97% yield (1.04 g).

### Reuse experiment of $G_4\text{-Cu}^{2+}_{12}$

**1a** (0.5 mmol) was reacted using fresh  $G_4\text{-Cu}^{2+}_{12}$  (5  $\mu\text{mol}$  Cu) in 4 mL  $\alpha,\alpha,\alpha$ -trifluorotoluene (TFT), after which the synthesized **2a** was removed from the reaction mixture by filtration. **1a** (0.5 mmol) was added to the filtered TFT solution, still containing the original  $G_4\text{-Cu}^{2+}_{12}$ , and the mixture was vigorously stirred at 50 °C for 18 h. By repeating this process, it was determined that the  $G_4\text{-Cu}^{2+}_{12}$  catalyst could be reused without significant loss of its activity and selectivity; the yield of **2a** from the first reaction, as determined by  $^1\text{H}$  NMR, was 96%, while the isolated yields were 83% (fresh catalyst), and 93% (first reuse).

### Product identification

The reaction products were identified by  $^1\text{H}$  and  $^{13}\text{C}$  NMR and, in each case, the chemical shifts of the products were in agreement with those reported in the literature, as summarized

below.

3,3',5,5'-Tetramethyldiphenylquinone (DPQ, **2a**) (CAS-RN 4906-22-3) (Ref. 7S)

3,3',5,5'-Tetramethylbiphenyl-2,2'-diol (TMBP, **3a**) (CAS-RN 2417-04-1) (Ref. 7S)

2,6-Dimethylbenzoquinone (DMQ, **4a**) (CAS-RN 527-61-7) (Ref. 8S)

Poly(2,6-dimethylphenylene ether) (PPE, **5a**) (CAS-RN 42397-25-1) (Ref. 9S)

3,3',5,5'-Tetraisopropyldiphenylquinone (**2b**) (CAS-RN 2178-51-0) (Ref. 7S)

3,3'-Di-*tert*-butyl-5,5'-dimethyldiphenylquinone (**2c**) (CAS-RN 2417-00-1) (Likely a mixture of *cis* and *trans* isomers, Ref. 10S)

#### UV-vis absorption measurement of $G_x-Cu^{2+}_n$

UV-vis titrations of  $G_4$ -TEBA with  $CuCl_2$  were carried out in air at 25 °C. In order to measure the LMCT of the dendrimer- $Cu^{2+}$  species, 2.4 mL of a 0.17 mM solution of  $G_4$ -TEBA in  $CH_3CN/CHCl_3$  (1:2 v/v) were added to a quartz cuvette (1 cm optical path) equipped with a cap and a stir bar. A 20  $\mu$ L quantity of a 20 mM solution of  $CuCl_2$  in  $CH_3CN/CHCl_3$  (1:2 v/v), sufficient to give a 1:1 equivalent ratio between Cu and  $G_4$ -TEBA, was then added to the stirred dendrimer solution within the cuvette using a micropipette (Figure S2). When measuring the d-d transition of the  $Cu^{2+}$  species, 12 mL of an 4.2  $\mu$ M solution of  $G_4$ -TEBA in  $CH_3CN/CHCl_3$  (1:2 v/v) in a cuvette with a 5 cm optical path, and 50  $\mu$ L of a 1.0 mM solution of  $CuCl_2$  (again resulting in a 1:1 Cu to  $G_4$ -TEBA equivalent ratio) in  $CH_3CN/CHCl_3$  (1:2 v/v) were used (Figure S3). In processing the resulting UV-vis spectra, the absorption spectrum of a reference sample of  $G_4$ -TEBA was subtracted. Based on titration of  $G_4$ -TEBA with  $CuCl_2$  in  $CH_3CN/CHCl_3$  solution in this manner, the maximum number of  $Cu^{2+}$  ions encapsulated within a  $G_4$ -TEBA dendrimer was estimated to be 32 (Figure S4).<sup>11S</sup> In the same way, the maximum number of  $Cu^{2+}$  ions situated in the

$G_3$ - and  $G_5$ -TEBA dendrimers was estimated to be 16 and 48, respectively (Figures S5 and S6). Also, each spectrum of  $G_x\text{-Cu}^{2+}_n$  ( $x = 3-5$ ) exhibited a sigmoid behavior in the region of smaller ratio of  $\text{Cu}/G_x\text{-TEBA}$  ( $n \leq 6$  for  $G_3$ ,  $n \leq 12$  for  $G_4$ , and  $n \leq 16$  for  $G_5$ , respectively). It seems that the sigmoid behavior in the titration curve is peculiar to dendrimer-encapsulated metal complex.<sup>11S</sup> These phenomena might be ascribed to the differences of the environment around  $\text{Cu}^{2+}$  species within  $G_x\text{-Cu}^{2+}_n$ .

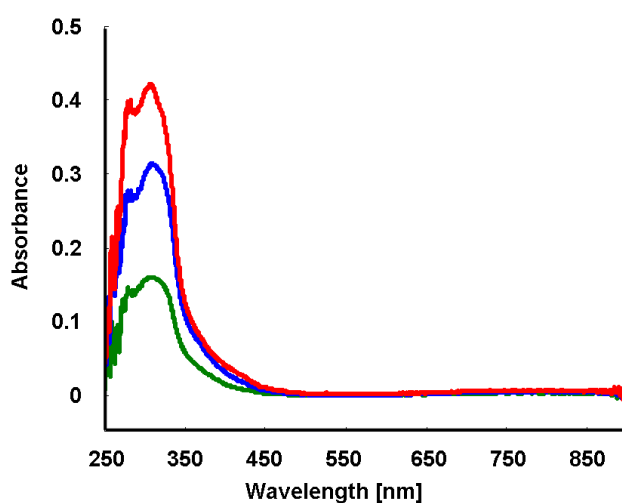

**Fig. S2** UV-vis spectra of  $G_4\text{-Cu}^{2+}_n$  ( $n = 4$  (green), 8 (blue) and 12 (red)). (Note that the absorption spectrum of a  $G_4$ -TEBA reference sample has been subtracted from each of these spectra.)

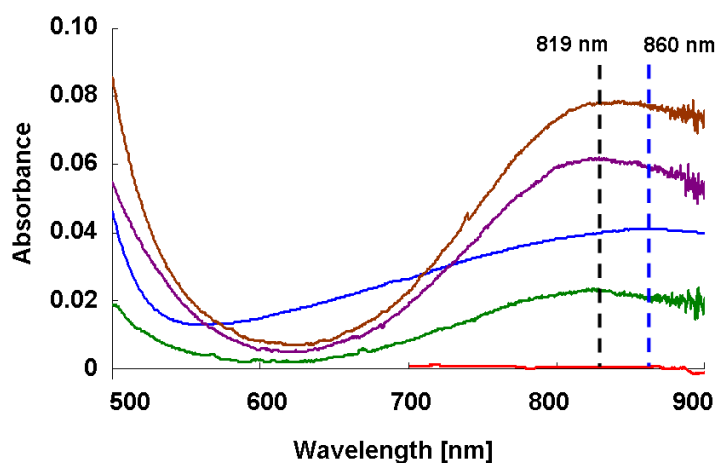

**Fig. S3** UV-vis spectra of  $G_4$ -TEBA (red),  $\text{CuCl}_2$  (blue),  $G_4\text{-Cu}^{2+}_{12}$  (green),  $G_4\text{-Cu}^{2+}_{24}$  (purple) and  $G_4\text{-Cu}^{2+}_{36}$  (brown). (Note that the absorption spectrum of a  $G_4$ -TEBA reference sample has been subtracted from each of these spectra.)

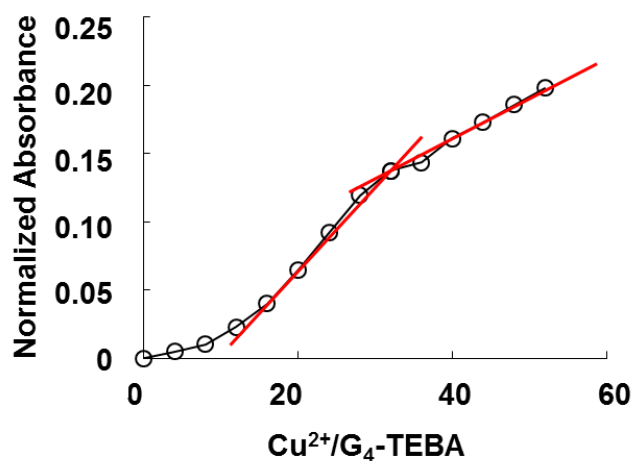

**Fig. S4** Titration curve of G<sub>4</sub>-Cu<sup>2+</sup><sub>n</sub> at 819 nm. Absorbance values have been normalized to the initial volume of 12 mL.

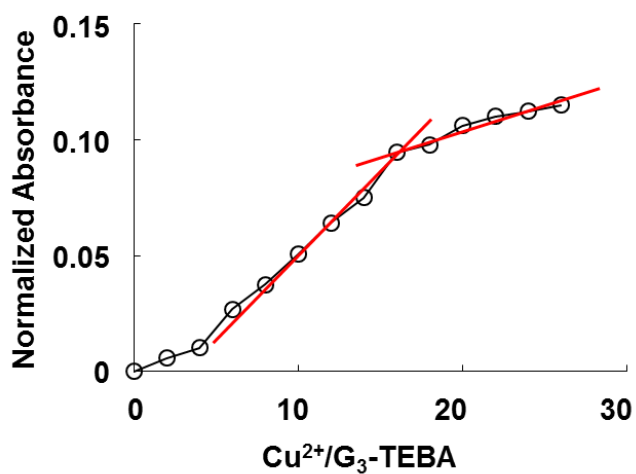

**Fig. S5** Titration curve of G<sub>3</sub>-Cu<sup>2+</sup><sub>n</sub> at 819 nm. Absorbance values have been normalized to the initial volume of 12 mL.

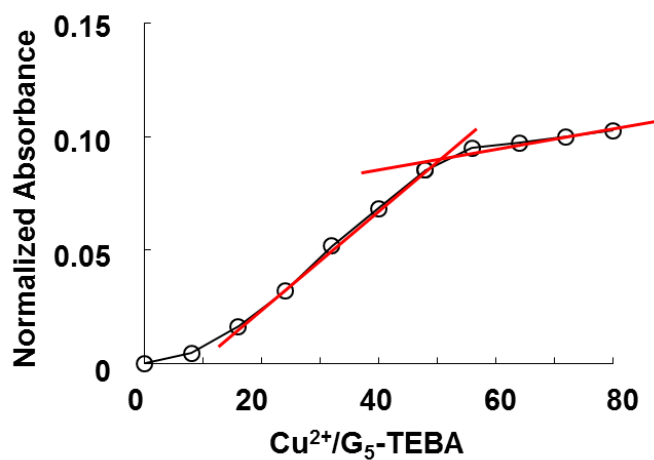

**Fig. S6** Titration curve of G<sub>5</sub>-Cu<sup>2+</sup><sub>n</sub> at 819 nm. Absorbance values have been normalized to the initial volume of 12 mL.

### Cu K-edge XAFS experiments

The X-ray absorption near edge structure (XANES) spectra of  $G_4\text{-Cu}^{2+}_{12}$  exhibited an edge peak at 8982 eV, a characteristic feature of the copper(II) ion with nitrogen ligands<sup>12S</sup> (Figure S7). This peak may be assigned to the shakedown satellite involving a  $1s \rightarrow 4p$  transition with simultaneous LMCT.

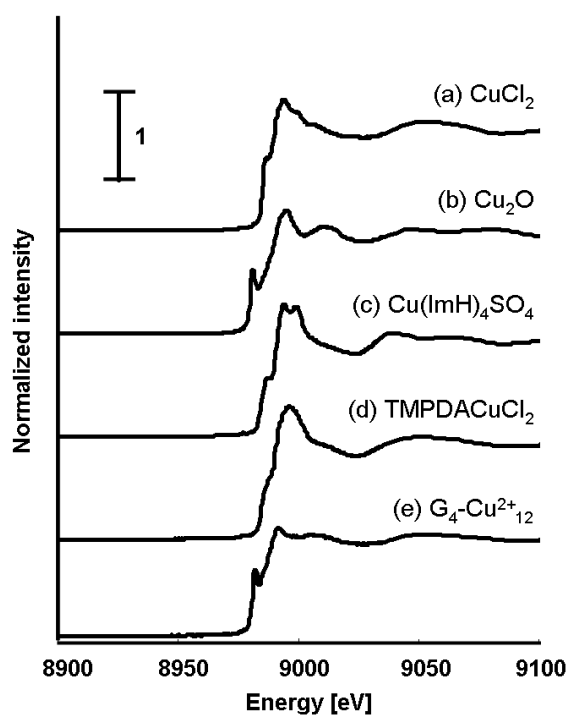

Fig. S7 FT of EXAFS spectra of various Cu complexes.

Table S1 Curve-fitting analysis of Cu K-edge EXAFS data for  $G_4\text{-Cu}^{2+}_{12}$ <sup>[a]</sup>

| Shell | CN <sup>[b]</sup> | R <sup>[c]</sup> / Å | $\sigma^2$ <sup>[d]</sup> / Å <sup>2</sup> |
|-------|-------------------|----------------------|--------------------------------------------|
| Cu-Cl | 2.0               | 2.23                 | 0.0059                                     |
| Cu-N  | 2.0               | 1.98                 | 0.0010                                     |

[a] The region of 1.2-2.4 Å in FT of samples was inversely transformed.  
[b] Coordination number. [c] Interatomic distance. [d] Debye-Waller factor



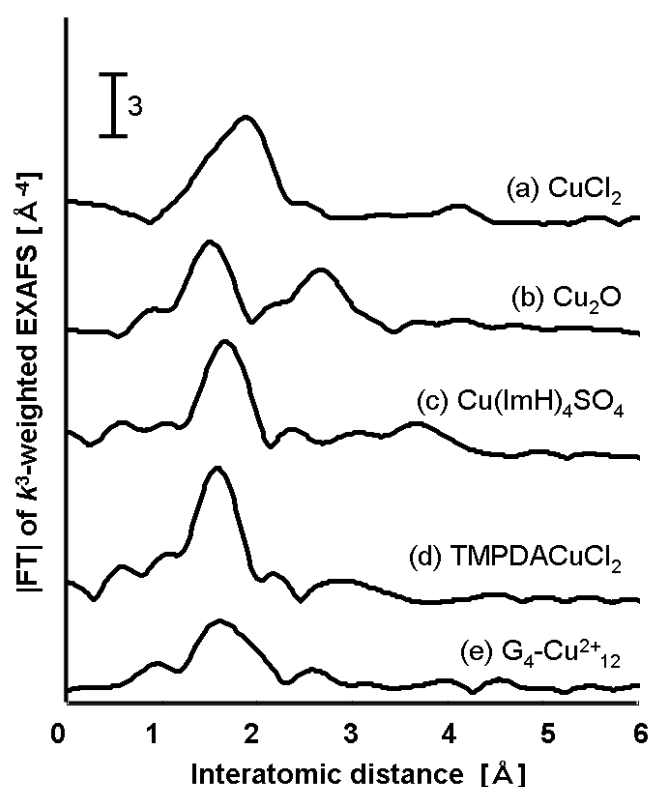

Fig. S8 Cu K-edge XANES spectra of various Cu complexes.

#### Preparation and FTIR studies of G<sub>4</sub>-Cu<sup>2+</sup><sub>n</sub>(N<sub>3</sub>)

G<sub>4</sub>-TEBA encapsulated-Cu azide complexes (G<sub>4</sub>-Cu<sup>2+</sup><sub>n</sub>(N<sub>3</sub>)) were prepared as follows. A 200 μL quantity of a 5.0 × 10<sup>-5</sup> mM MeOH solution of NaN<sub>3</sub> was added to 1 mL of a MeOH solution of G<sub>4</sub>-Cu<sup>2+</sup><sub>n</sub> (10 μmol Cu) at 40 °C and the mixture stirred for 4 h. Next, 1 mL of *n*-BuOH was added and the MeOH was evaporated under reduced pressure. The residue was diluted with 10 mL CH<sub>2</sub>Cl<sub>2</sub> and filtered using a disk membrane filter (0.20 μm PTFE membrane, 25 mm diameter), after which the solution was concentrated under reduced pressure to afford G<sub>4</sub>-Cu<sup>2+</sup><sub>n</sub>(N<sub>3</sub>). FTIR spectra of the G<sub>4</sub>-Cu<sup>2+</sup><sub>n</sub>(N<sub>3</sub>) complexes were acquired at room temperature in CHCl<sub>3</sub> using a 0.1 mm liquid cell with NaCl windows. Spectra were recorded at a resolution of 1 cm<sup>-1</sup> and 32 scans were summed for each spectrum.

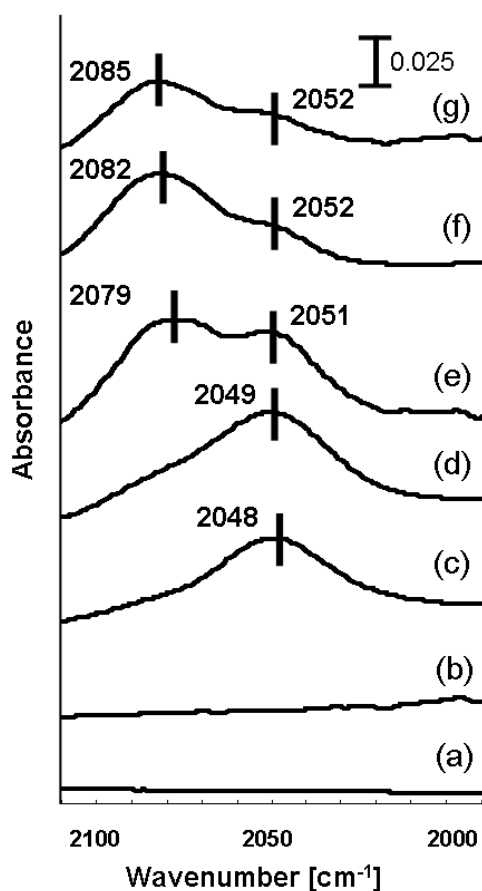

**Fig. S9** FTIR spectra of (a) G<sub>4</sub>-TEBA, (b) G<sub>4</sub>-Cu<sup>2+</sup><sub>12</sub>, (c) G<sub>4</sub>-Cu<sup>2+</sup><sub>2</sub>(N<sub>3</sub>), (d) G<sub>4</sub>-Cu<sup>2+</sup><sub>6</sub>(N<sub>3</sub>), (e) G<sub>4</sub>-Cu<sup>2+</sup><sub>12</sub>(N<sub>3</sub>), (f) G<sub>4</sub>-Cu<sup>2+</sup><sub>16</sub>(N<sub>3</sub>) and (g) G<sub>4</sub>-Cu<sup>2+</sup><sub>24</sub>(N<sub>3</sub>).

### Oxidation of TMBP to DPQ catalyzed by G<sub>4</sub>-Cu<sup>2+</sup><sub>12</sub>

The oxidation of TMBP was performed using G<sub>4</sub>-Cu<sup>2+</sup><sub>12</sub> as the catalyst and it was found that G<sub>4</sub>-Cu<sup>2+</sup><sub>12</sub> produced the desired product DPQ in quantitative yield (Scheme S1). This result supports our theory that TMBP is a plausible reaction intermediate in the C–C coupling of DMP to DPQ.

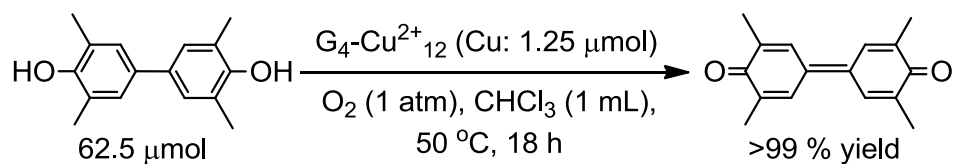

**Scheme S1** Oxidation of TMBP catalyzed by G<sub>4</sub>-Cu<sup>2+</sup><sub>12</sub>.

## References

- [1S] E. M. M. de Brabander-van den Berg and E. W. Meijer, *Angew. Chem., Int. Ed. Engl.*, 1993, **32**, 1308.
- [2S] M. Ooe, M. Murata, T. Mizugaki, K. Ebitani and K. Kaneda, *Nano Lett.*, 2002, **2**, 999.
- [3S] W. F. L. Armarego and C. L. L. Chai, *Purification of Laboratory Chemicals*, Elsevier, Oxford, 6th ed, 2009.
- [4S] A. F. Wells, *J. Chem. Soc.*, 1947, 1670.
- [5S] G. Fransson and B. K. S. Lundberg, *Acta Chem. Scand.*, 1972, **26**, 3969.
- [6S] G. Pandey, C. Muralikrishna and U. T. Bhalerao, *Tetrahedron Lett.*, 1990, **26**, 3771.
- [7S] B.-S. Liao, Y.-H. Liu, S.-M. Peng and S.-T. Liu, *Dalton Trans.*, 2012, **41**, 1158.
- [8S] SDBS Web: <http://riodb01.ibase.aist.go.jp/sdbs/> (National Institute of Advanced Science and Technology, 2013. 01. 22.)
- [9S] L. Gui, H. Wang, B. Shentu and Z. Weng, *J. Appl. Polym. Sci.*, 2013, **128**, 2919.
- [10S] (a) A. Rieker and H. Kessler, *Chem. Ber.*, 1969, **102**, 2147; (b) J. M. Blatchly, R. J. S. Green, J. F. McOmie and Z. Weng, *J. Chem. Soc. Perkin. Trans.*, 1976, 1267.
- [11S] Y. Niu and R. M. Crooks, *Chem. Mater.*, 2003, **15**, 3463.
- [12S] (a) J.-H. Choy, J.-B. Yoon and H. Jung, *J. Phys. Chem. B*, 2002, **106**, 11120; (b) J. Chaboy, A. Muñoz-Páez, F. Carrera, P. Merklings and E. S. Marcos, *Phys. Rev. B*, 2005, **74**, 134208.
